# Supplementary material for: m6A methyltransferase METTL3 maintains colon cancer tumorigenicity by suppressing SOCS2 to promote cell proliferation
Source: PubMed Central journal article supplement — Oncol Rep. 2020 Jun 26;44(3):973–86. doi: 10.3892/or.2020.7665 (PMC7388248; doi:10.3892/or.2020.7665), 2020-06-26
Supplement: Supplementary_Data.pdf [file Supplementary_Data.pdf]

Table SI. Sequences of the qPCR primers.

| Primers         | 5'-3'                                   |
|-----------------|-----------------------------------------|
| SOCS2-F         | TGCAAGGATAAGCGGACAGG                    |
| SOCS2-R         | CAGAGATGGTGCTGACGTGT                    |
| METTL3-F        | CTTTGCCAGTTCGTTAGTCTC                   |
| METTL3-R        | CTGACCTTCTTGCTCTGTTGTT                  |
| LGR5-F          | CTACATGGTCGCTCTCATCTTG                  |
| LGR5-R          | ATATTCTCCAGGTCTCCCTTGTC                 |
| CyclinB1-F      | ATACTGCCTCTCCAAGCCCAATG                 |
| CyclinB1-R      | GATCAGCTCCATCTTCTGCATCCA                |
| P21-F           | TCAAATCGTCCAGCGACCTTCC                  |
| P21-R           | TCCATAGCCTCTACTGCCACCAT                 |
| SOX2-F          | ACATGATGGAGACGGAGCTGAAG                 |
| SOX2-R          | GGGACCACACCATGAAGGCATT                  |
| PCNA-F          | CGTGAACCTCACCAGTATGTCCAA                |
| PCNA-R          | ACTTTCTCCTGGTTTGGTGCTTCA                |
| Ki67-F          | CCTAGAAGACTTGGCTGGCTTGAA                |
| Ki67-R          | GGACTGTGGCTTGAAGATTGTTGG                |
| CTNNB1-F        | AGAGTGCTGAAGGTGCTATCTGT                 |
| CTNNB1-R        | TCCTGAGAGTCCAAAGACAGTTC                 |
| GAPDH-F         | TGCACCACCAACTGCTTAGC                    |
| GAPDH-R         | GGCATGGACTGTGGTCATGAG                   |
| LGR5 promoter-F | CGAGCTCCACACGTATTTTTATTG<br>CATCTCAGTTC |
| LGR5 promoter-R | CCCTCGAGAAAGCGCTCCAGCC<br>CGA           |

F, forward; R, reverse; SOCS2, suppressor of cytokine signaling 2; METTL3, methyltransferase like 3; LGR5, leucine-rich repeat-containing G protein-coupled receptor 5; SOX2, SRY-box transcription factor 2; PCNA, proliferating cell nuclear antigen; CTNNB1, catenin  $\beta$ 1; GAPDH, glyceraldehyde 3-phosphate dehydrogenase.

Table SII. Bioinformatics analysis of METTL3.

A, GO analysis reveals these candidates that are sorted into multiple bioprocesses

| GO terms (Biological process)                                        | Count | P-value  |
|----------------------------------------------------------------------|-------|----------|
| Positive regulation of transcription from RNA polymerase II promoter | 18    | 9.30E-11 |
| Primary miRNA processing                                             | 5     | 4.70E-09 |
| Negative regulation of transcription from RNA polymerase II promoter | 12    | 1.40E-06 |
| Positive regulation of gene expression                               | 8     | 4.10E-06 |
| Positive regulation of transcription, DNA-templated                  | 10    | 5.00E-06 |
| Negative regulation of apoptotic process                             | 9     | 1.70E-05 |
| Cell cycle arrest                                                    | 6     | 2.90E-05 |
| Cellular response to mechanical stimulus                             | 5     | 3.20E-05 |
| mRNA methylation                                                     | 3     | 9.50E-05 |
| Transcription from RNA polymerase II promoter                        | 8     | 3.00E-04 |
| Positive regulation of fibroblast proliferation                      | 4     | 3.50E-04 |
| mRNA processing                                                      | 5     | 1.10E-03 |
| Negative regulation of protein catabolic process                     | 3     | 3.00E-03 |
| Cellular response to lipopolysaccharide                              | 4     | 3.00E-03 |
| Lipopolysaccharide-mediated signaling pathway                        | 3     | 3.00E-03 |
| Cytokine-mediated signaling pathway                                  | 4     | 4.60E-03 |
| Positive regulation of epithelial cell proliferation                 | 3     | 1.00E-02 |
| Ras protein signal transduction                                      | 3     | 1.40E-02 |
| Positive regulation of inflammatory response                         | 3     | 1.50E-02 |
| Canonical Wnt signaling pathway                                      | 3     | 1.90E-02 |
| Regulation of gene expression                                        | 3     | 2.70E-02 |
| Cell surface receptor signaling pathway                              | 4     | 3.30E-02 |
| Response to drug                                                     | 4     | 4.30E-02 |
| Positive regulation of NF-kappaB transcription factor activity       | 3     | 4.60E-02 |
| Positive regulation of I-kappaB kinase/NF-kappaB signaling           | 3     | 6.40E-02 |
| Cell proliferation                                                   | 4     | 6.70E-02 |
| Inflammatory response                                                | 4     | 7.30E-02 |
| Positive regulation of ERK1 and ERK2 cascade                         | 3     | 7.40E-02 |
| Signal transduction                                                  | 7     | 7.40E-02 |
| Fc-epsilon receptor signaling pathway                                | 3     | 7.60E-02 |
| Positive regulation of cell migration                                | 3     | 8.10E-02 |
| In utero embryonic development                                       | 3     | 8.30E-02 |
| Positive regulation of cell proliferation                            | 4     | 1.20E-01 |
| MAPK cascade                                                         | 3     | 1.40E-01 |
| Regulation of transcription, DNA-templated                           | 5     | 5.50E-01 |

B, KEGG analysis indicates that these candidates are involved in numerous signal pathways, and in benign and malignant diseases

| KEGG pathway                                             | Count | P-value  |
|----------------------------------------------------------|-------|----------|
| Chagas disease ( <i>American trypanosomiasis</i> )       | 8     | 9.90E-08 |
| Signaling pathways regulating pluripotency of stem cells | 8     | 7.60E-07 |
| Proteoglycans in cancer                                  | 8     | 8.30E-06 |
| Hepatitis C                                              | 7     | 9.60E-06 |
| FoxO signaling pathway                                   | 7     | 1.00E-05 |
| Hepatitis B                                              | 7     | 1.60E-05 |
| HTLV-I infection                                         | 8     | 4.10E-05 |
| Toxoplasmosis                                            | 6     | 8.00E-05 |
| Pancreatic cancer                                        | 5     | 1.10E-04 |
| Prolactin signaling pathway                              | 5     | 1.50E-04 |
| Pertussis                                                | 5     | 1.90E-04 |
| Salmonella infection                                     | 5     | 2.80E-04 |
| ErbB signaling pathway                                   | 5     | 3.30E-04 |
| MAPK signaling pathway                                   | 7     | 3.70E-04 |
| Influenza A                                              | 6     | 4.90E-04 |
| Bladder cancer                                           | 4     | 5.10E-04 |

Table SII. Continued.

B, KEGG analysis indicates that these candidates are involved in numerous signal pathways, and in benign and malignant diseases

| KEGG pathway                                                      | Count | P-value  |
|-------------------------------------------------------------------|-------|----------|
| Tuberculosis                                                      | 6     | 5.30E-04 |
| Pathways in cancer                                                | 8     | 6.00E-04 |
| Herpes simplex infection                                          | 6     | 6.20E-04 |
| Toll-like receptor signaling pathway                              | 5     | 7.00E-04 |
| Sphingolipid signaling pathway                                    | 5     | 1.10E-03 |
| Osteoclast differentiation                                        | 5     | 1.50E-03 |
| Colorectal cancer                                                 | 4     | 1.70E-03 |
| Inflammatory bowel disease (IBD)                                  | 4     | 1.90E-03 |
| Epithelial cell signaling in <i>Helicobacter pylori</i> infection | 4     | 2.20E-03 |
| Leishmaniasis                                                     | 4     | 2.50E-03 |
| Chronic myeloid leukemia                                          | 4     | 2.70E-03 |
| NF- $\kappa$ B signaling pathway                                  | 4     | 4.50E-03 |
| Prostate cancer                                                   | 4     | 4.70E-03 |
| GnRH signaling pathway                                            | 4     | 5.10E-03 |
| Epstein-Barr virus infection                                      | 5     | 5.90E-03 |
| HIF-1 signaling pathway                                           | 4     | 6.30E-03 |
| TNF signaling pathway                                             | 4     | 7.90E-03 |
| PI3K-Akt signaling pathway                                        | 6     | 9.80E-03 |
| Neurotrophin signaling pathway                                    | 4     | 1.10E-02 |
| Cell cycle                                                        | 4     | 1.20E-02 |
| Endometrial cancer                                                | 3     | 1.70E-02 |
| Legionellosis                                                     | 3     | 1.90E-02 |
| NOD-like receptor signaling pathway                               | 3     | 1.90E-02 |
| Hippo signaling pathway                                           | 4     | 2.00E-02 |
| Acute myeloid leukemia                                            | 3     | 2.00E-02 |
| Central carbon metabolism in cancer                               | 3     | 2.60E-02 |
| Glioma                                                            | 3     | 2.60E-02 |
| Shigellosis                                                       | 3     | 2.60E-02 |
| Transcriptional misregulation in cancer                           | 4     | 2.70E-02 |
| Fc epsilon RI signaling pathway                                   | 3     | 2.90E-02 |
| Adipocytokine signaling pathway                                   | 3     | 3.00E-02 |
| RIG-I-like receptor signaling pathway                             | 3     | 3.00E-02 |
| Adherens junction                                                 | 3     | 3.10E-02 |
| Melanoma                                                          | 3     | 3.10E-02 |
| TGF- $\beta$ signaling pathway                                    | 3     | 4.20E-02 |

METTL3, methyltransferase like 3; GO, Gene Ontology; KEGG, Kyoto Encyclopedia of Genes and Genomes.

Table SIII. Expression profiles of METTL3, SOCS2 and LGR5 in CRC through the Oncomine database.

| DATASET                 | Normal (cases)                     |              | Tumor (cases) | METTL3          |               |                 | SOCS2           |               |               | LGR5            |         |  |
|-------------------------|------------------------------------|--------------|---------------|-----------------|---------------|-----------------|-----------------|---------------|---------------|-----------------|---------|--|
|                         | Fold change                        | t-test       |               | P-value         | Fold change   | t-test          | P-value         | Fold change   | t-test        | P-value         | (Refs.) |  |
| TCGA colorectal         | Colon (19)                         | /            | /             | /               | <b>-2.068</b> | <b>1.39E-07</b> | /               | /             | /             | /               | /       |  |
|                         | Rectum (3)                         | <b>2.208</b> | <b>10.413</b> | <b>9.18E-14</b> | <b>-2.788</b> | <b>-10.792</b>  | <b>9.45E-17</b> | <b>3.229</b>  | <b>7.800</b>  | <b>1.04E-11</b> | /       |  |
| Skrzypczak colorectal 2 | Cecum adenocarcinoma (22)          | <b>2.321</b> | <b>7.333</b>  | <b>6.37E-09</b> | <b>-2.570</b> | <b>-7.867</b>   | <b>1.52E-09</b> | <b>4.497</b>  | <b>8.109</b>  | <b>3.94E-09</b> | /       |  |
|                         | Colon adenocarcinoma (101)         | <b>2.052</b> | <b>9.863</b>  | <b>1.39E-13</b> | <b>-2.926</b> | <b>-13.179</b>  | <b>9.53E-19</b> | <b>4.533</b>  | <b>12.473</b> | <b>1.89E-22</b> | (43)    |  |
|                         | Colon adenoma (5)                  | <b>1.940</b> | <b>6.343</b>  | <b>1.56E-05</b> | <b>-4.196</b> | <b>-11.681</b>  | <b>5.35E-07</b> | <b>29.997</b> | <b>13.880</b> | <b>3.85E-09</b> | /       |  |
|                         | Colon adenoma (5)                  | <b>1.446</b> | <b>4.118</b>  | <b>7.41E-04</b> | <b>-5.076</b> | <b>-8.298</b>   | <b>1.02E-06</b> | /             | /             | /               | /       |  |
|                         | Colon carcinoma (5)                | 1.007        | 0.059         | 4.77E-01        | <b>-2.769</b> | <b>-12.047</b>  | <b>1.73E-08</b> | <b>8.264</b>  | <b>8.338</b>  | <b>8.15E-07</b> | /       |  |
| Graudens colon          | Colon carcinoma (5)                | -1.011       | -0.191        | 5.72E-01        | /             | /               | /               | /             | /             | /               | /       |  |
|                         | Colon (12)                         | 1.072        | 0.903         | 1.88E-01        | <b>-2.018</b> | <b>-7.086</b>   | <b>7.52E-08</b> | /             | /             | /               | (44)    |  |
| Sabates-bellver colon   | Ascending colon (4)                | <b>1.704</b> | <b>5.354</b>  | <b>1.50E-06</b> | -1.125        | -1.314          | 9.80E-02        | <b>5.873</b>  | <b>13.611</b> | <b>1.06E-15</b> | (45)    |  |
|                         | Descending colon (5)               | <b>1.598</b> | <b>2.679</b>  | <b>1.50E-02</b> | -1.106        | -0.458          | 3.31E-01        | /             | /             | /               | /       |  |
| Skrzypczak colorectal   | Rectum (7)                         | /            | /             | /               | /             | /               | /               | /             | /             | /               | /       |  |
|                         | Sigmoid colon (15)                 | /            | /             | /               | /             | /               | /               | /             | /             | /               | /       |  |
| Kaiser colon            | Transverse colon (1)               | /            | /             | /               | /             | /               | /               | /             | /             | /               | /       |  |
|                         | Colorectal                         | <b>1.242</b> | <b>3.063</b>  | <b>2.00E-03</b> | <b>-1.372</b> | <b>-3.742</b>   | <b>2.03E-04</b> | <b>4.745</b>  | <b>15.225</b> | <b>1.17E-23</b> | (43)    |  |
|                         | Tissue (24)                        | 1.041        | 0.793         | 2.15E-01        | <b>-1.261</b> | <b>-2.510</b>   | <b>7.00E-03</b> | <b>4.871</b>  | <b>6.879</b>  | <b>3.57E-09</b> | /       |  |
|                         | Colon (5)                          | 1.534        | 2.107         | 3.00E-02        | /             | /               | /               | /             | /             | /               | (46)    |  |
|                         | Rectosigmoid adenocarcinoma (10)   | 1.375        | 1.934         | 5.30E-02        | /             | /               | /               | /             | /             | /               | /       |  |
| Hong colorectal         | Colon adenocarcinoma (41)          | <b>1.604</b> | <b>2.904</b>  | <b>1.50E-02</b> | <b>-2.028</b> | <b>-7.166</b>   | <b>1.74E-05</b> | <b>6.905</b>  | <b>12.859</b> | <b>5.21E-14</b> | /       |  |
|                         | Cecum adenocarcinoma (17)          | <b>1.482</b> | <b>2.397</b>  | <b>2.80E-02</b> | /             | /               | /               | /             | /             | /               | /       |  |
|                         | Rectal mucinous adenocarcinoma (4) | 1.281        | 1.917         | 5.60E-02        | /             | /               | /               | /             | /             | /               | /       |  |
|                         | Colon mucinous adenocarcinoma (13) | <b>1.199</b> | <b>2.253</b>  | <b>2.80E-02</b> | /             | /               | /               | /             | /             | /               | /       |  |
|                         | Colorectal carcinoma (70)          | <b>1.476</b> | <b>2.100</b>  | <b>2.80E-02</b> | <b>-3.314</b> | <b>-11.710</b>  | <b>1.07E-18</b> | <b>6.431</b>  | <b>8.671</b>  | <b>5.28E-13</b> | (47)    |  |
| Gaedcke colorectal      | Rectum (65)                        | <b>1.030</b> | <b>0.443</b>  | <b>3.29E-01</b> | <b>-1.590</b> | <b>-6.537</b>   | <b>2.02E-09</b> | <b>1.854</b>  | <b>7.407</b>  | <b>1.32E-10</b> | (48)    |  |
| Alon colon              | Colon (22)                         | /            | /             | /               | 1.024         | 0.253           | 5.99E-01        | /             | /             | /               | (49)    |  |
|                         | Colon (18)                         | /            | /             | /               | -1.059        | -0.524          | 3.02E-01        | /             | /             | /               | (50)    |  |
| Ki colon                | Colon (28) liver (13)              | /            | /             | /               | 1.319         | -3.013          | 2.00E-03        | 1.379         | 3.602         | 2.76E-04        | (51)    |  |
|                         | Intestinal mucosa (22)             | /            | /             | /               | -1.062        | -0.427          | 3.36E-01        | 1.397         | 2.626         | 6.00E-03        | (52)    |  |

Elevated mRNA expression levels of METTL3 and LGR5 were found in CRC. Meanwhile, downregulation of SOCS2 mRNA was observed in these clinical data. Those that gained statistical significance (P<0.05) are highlighted in bold print. CRC, colorectal cancer; METTL3, methyltransferase like 3; SOCS2, suppressor of cytokine signaling 2; LGR5, leucine-rich repeat-containing G protein-coupled receptor 5.
